# Supplementary material
Source: Springer Nature journal article supplement (https://www.springermedizin.de/resource/supplementary/12883_2013_1007_MOESM1_ESM.pdf/9456620)
Supplement: MOESM1 [file 9456620]

| Patient No.     | Scanner                         | Primary acquisition data                                                                                                                                                                                                                                                                                                             | Primary Recon Data | Secondary Recon Data |          |                                 |             |             |                                                                                                                                                                                                                                           |     |         |             |              |      |                                                                                                                                                                                                                    |                                                                                                                                                                                                                                                                                                                                             |         |         |         |       |     |                                                                                                                                                                                                                                                                                                                                                                                            |         |         |         |                 |     |     |                |   |   |         |   |   |          |   |   |
|-----------------|---------------------------------|--------------------------------------------------------------------------------------------------------------------------------------------------------------------------------------------------------------------------------------------------------------------------------------------------------------------------------------|--------------------|----------------------|----------|---------------------------------|-------------|-------------|-------------------------------------------------------------------------------------------------------------------------------------------------------------------------------------------------------------------------------------------|-----|---------|-------------|--------------|------|--------------------------------------------------------------------------------------------------------------------------------------------------------------------------------------------------------------------|---------------------------------------------------------------------------------------------------------------------------------------------------------------------------------------------------------------------------------------------------------------------------------------------------------------------------------------------|---------|---------|---------|-------|-----|--------------------------------------------------------------------------------------------------------------------------------------------------------------------------------------------------------------------------------------------------------------------------------------------------------------------------------------------------------------------------------------------|---------|---------|---------|-----------------|-----|-----|----------------|---|---|---------|---|---|----------|---|---|
| 1-5             | Siemens Sensation 16            | <p style="text-align: center;">Sequential</p> <table border="1" data-bbox="319 308 715 477"> <tr> <td></td> <td>Skull base</td> <td>Cerebrum</td> </tr> <tr> <td>kV</td> <td colspan="2">120</td> </tr> <tr> <td>mAs</td> <td>290</td> <td>280</td> </tr> <tr> <td>Collimation</td> <td colspan="2">16 x 0.75 mm</td> </tr> </table> |                    | Skull base           | Cerebrum | kV                              | 120         |             | mAs                                                                                                                                                                                                                                       | 290 | 280     | Collimation | 16 x 0.75 mm |      | <p style="text-align: center;">Kernel H10</p> <table border="1" data-bbox="744 342 1026 443"> <tr> <td></td> <td>ST (mm)</td> <td>RI (mm)</td> </tr> <tr> <td>Axial</td> <td>0.75</td> <td>0.5</td> </tr> </table> |                                                                                                                                                                                                                                                                                                                                             | ST (mm) | RI (mm) | Axial   | 0.75  | 0.5 | <p style="text-align: center;">Kernel H32</p> <table border="1" data-bbox="1057 239 1380 505"> <tr> <td></td> <td>ST (mm)</td> <td>RI (mm)</td> </tr> <tr> <td>Axial skullbase</td> <td>4.5</td> <td>4.5</td> </tr> <tr> <td>Axial cerebrum</td> <td>9</td> <td>9</td> </tr> <tr> <td>Coronal</td> <td>5</td> <td>3</td> </tr> <tr> <td>Sagittal</td> <td>5</td> <td>3</td> </tr> </table> |         | ST (mm) | RI (mm) | Axial skullbase | 4.5 | 4.5 | Axial cerebrum | 9 | 9 | Coronal | 5 | 3 | Sagittal | 5 | 3 |
|                 | Skull base                      | Cerebrum                                                                                                                                                                                                                                                                                                                             |                    |                      |          |                                 |             |             |                                                                                                                                                                                                                                           |     |         |             |              |      |                                                                                                                                                                                                                    |                                                                                                                                                                                                                                                                                                                                             |         |         |         |       |     |                                                                                                                                                                                                                                                                                                                                                                                            |         |         |         |                 |     |     |                |   |   |         |   |   |          |   |   |
| kV              | 120                             |                                                                                                                                                                                                                                                                                                                                      |                    |                      |          |                                 |             |             |                                                                                                                                                                                                                                           |     |         |             |              |      |                                                                                                                                                                                                                    |                                                                                                                                                                                                                                                                                                                                             |         |         |         |       |     |                                                                                                                                                                                                                                                                                                                                                                                            |         |         |         |                 |     |     |                |   |   |         |   |   |          |   |   |
| mAs             | 290                             | 280                                                                                                                                                                                                                                                                                                                                  |                    |                      |          |                                 |             |             |                                                                                                                                                                                                                                           |     |         |             |              |      |                                                                                                                                                                                                                    |                                                                                                                                                                                                                                                                                                                                             |         |         |         |       |     |                                                                                                                                                                                                                                                                                                                                                                                            |         |         |         |                 |     |     |                |   |   |         |   |   |          |   |   |
| Collimation     | 16 x 0.75 mm                    |                                                                                                                                                                                                                                                                                                                                      |                    |                      |          |                                 |             |             |                                                                                                                                                                                                                                           |     |         |             |              |      |                                                                                                                                                                                                                    |                                                                                                                                                                                                                                                                                                                                             |         |         |         |       |     |                                                                                                                                                                                                                                                                                                                                                                                            |         |         |         |                 |     |     |                |   |   |         |   |   |          |   |   |
|                 | ST (mm)                         | RI (mm)                                                                                                                                                                                                                                                                                                                              |                    |                      |          |                                 |             |             |                                                                                                                                                                                                                                           |     |         |             |              |      |                                                                                                                                                                                                                    |                                                                                                                                                                                                                                                                                                                                             |         |         |         |       |     |                                                                                                                                                                                                                                                                                                                                                                                            |         |         |         |                 |     |     |                |   |   |         |   |   |          |   |   |
| Axial           | 0.75                            | 0.5                                                                                                                                                                                                                                                                                                                                  |                    |                      |          |                                 |             |             |                                                                                                                                                                                                                                           |     |         |             |              |      |                                                                                                                                                                                                                    |                                                                                                                                                                                                                                                                                                                                             |         |         |         |       |     |                                                                                                                                                                                                                                                                                                                                                                                            |         |         |         |                 |     |     |                |   |   |         |   |   |          |   |   |
|                 | ST (mm)                         | RI (mm)                                                                                                                                                                                                                                                                                                                              |                    |                      |          |                                 |             |             |                                                                                                                                                                                                                                           |     |         |             |              |      |                                                                                                                                                                                                                    |                                                                                                                                                                                                                                                                                                                                             |         |         |         |       |     |                                                                                                                                                                                                                                                                                                                                                                                            |         |         |         |                 |     |     |                |   |   |         |   |   |          |   |   |
| Axial skullbase | 4.5                             | 4.5                                                                                                                                                                                                                                                                                                                                  |                    |                      |          |                                 |             |             |                                                                                                                                                                                                                                           |     |         |             |              |      |                                                                                                                                                                                                                    |                                                                                                                                                                                                                                                                                                                                             |         |         |         |       |     |                                                                                                                                                                                                                                                                                                                                                                                            |         |         |         |                 |     |     |                |   |   |         |   |   |          |   |   |
| Axial cerebrum  | 9                               | 9                                                                                                                                                                                                                                                                                                                                    |                    |                      |          |                                 |             |             |                                                                                                                                                                                                                                           |     |         |             |              |      |                                                                                                                                                                                                                    |                                                                                                                                                                                                                                                                                                                                             |         |         |         |       |     |                                                                                                                                                                                                                                                                                                                                                                                            |         |         |         |                 |     |     |                |   |   |         |   |   |          |   |   |
| Coronal         | 5                               | 3                                                                                                                                                                                                                                                                                                                                    |                    |                      |          |                                 |             |             |                                                                                                                                                                                                                                           |     |         |             |              |      |                                                                                                                                                                                                                    |                                                                                                                                                                                                                                                                                                                                             |         |         |         |       |     |                                                                                                                                                                                                                                                                                                                                                                                            |         |         |         |                 |     |     |                |   |   |         |   |   |          |   |   |
| Sagittal        | 5                               | 3                                                                                                                                                                                                                                                                                                                                    |                    |                      |          |                                 |             |             |                                                                                                                                                                                                                                           |     |         |             |              |      |                                                                                                                                                                                                                    |                                                                                                                                                                                                                                                                                                                                             |         |         |         |       |     |                                                                                                                                                                                                                                                                                                                                                                                            |         |         |         |                 |     |     |                |   |   |         |   |   |          |   |   |
| 6-7             | Siemens Definition Flash        | <p style="text-align: center;">Multislice helical</p> <table border="1" data-bbox="319 781 715 950"> <tr> <td>kV</td> <td>120</td> </tr> <tr> <td>mAs</td> <td>ref 320 tube current modulation</td> </tr> <tr> <td>Collimation</td> <td>40 x 0.6 mm</td> </tr> </table>                                                              | kV                 | 120                  | mAs      | ref 320 tube current modulation | Collimation | 40 x 0.6 mm | <p style="text-align: center;">Iterative Safire 2<br/>Kernel I26</p> <table border="1" data-bbox="744 832 1026 933"> <tr> <td></td> <td>ST (mm)</td> <td>RI (mm)</td> </tr> <tr> <td>Axial</td> <td>0.75</td> <td>0.5</td> </tr> </table> |     | ST (mm) | RI (mm)     | Axial        | 0.75 | 0.5                                                                                                                                                                                                                | <p style="text-align: center;">Iterative Safire 2<br/>Kernel I40s</p> <table border="1" data-bbox="1057 781 1380 950"> <tr> <td></td> <td>ST (mm)</td> <td>RI (mm)</td> </tr> <tr> <td>Axial</td> <td>5</td> <td>3</td> </tr> <tr> <td>Coronal</td> <td>5</td> <td>3</td> </tr> <tr> <td>Sagittal</td> <td>5</td> <td>3</td> </tr> </table> |         | ST (mm) | RI (mm) | Axial | 5   | 3                                                                                                                                                                                                                                                                                                                                                                                          | Coronal | 5       | 3       | Sagittal        | 5   | 3   |                |   |   |         |   |   |          |   |   |
| kV              | 120                             |                                                                                                                                                                                                                                                                                                                                      |                    |                      |          |                                 |             |             |                                                                                                                                                                                                                                           |     |         |             |              |      |                                                                                                                                                                                                                    |                                                                                                                                                                                                                                                                                                                                             |         |         |         |       |     |                                                                                                                                                                                                                                                                                                                                                                                            |         |         |         |                 |     |     |                |   |   |         |   |   |          |   |   |
| mAs             | ref 320 tube current modulation |                                                                                                                                                                                                                                                                                                                                      |                    |                      |          |                                 |             |             |                                                                                                                                                                                                                                           |     |         |             |              |      |                                                                                                                                                                                                                    |                                                                                                                                                                                                                                                                                                                                             |         |         |         |       |     |                                                                                                                                                                                                                                                                                                                                                                                            |         |         |         |                 |     |     |                |   |   |         |   |   |          |   |   |
| Collimation     | 40 x 0.6 mm                     |                                                                                                                                                                                                                                                                                                                                      |                    |                      |          |                                 |             |             |                                                                                                                                                                                                                                           |     |         |             |              |      |                                                                                                                                                                                                                    |                                                                                                                                                                                                                                                                                                                                             |         |         |         |       |     |                                                                                                                                                                                                                                                                                                                                                                                            |         |         |         |                 |     |     |                |   |   |         |   |   |          |   |   |
|                 | ST (mm)                         | RI (mm)                                                                                                                                                                                                                                                                                                                              |                    |                      |          |                                 |             |             |                                                                                                                                                                                                                                           |     |         |             |              |      |                                                                                                                                                                                                                    |                                                                                                                                                                                                                                                                                                                                             |         |         |         |       |     |                                                                                                                                                                                                                                                                                                                                                                                            |         |         |         |                 |     |     |                |   |   |         |   |   |          |   |   |
| Axial           | 0.75                            | 0.5                                                                                                                                                                                                                                                                                                                                  |                    |                      |          |                                 |             |             |                                                                                                                                                                                                                                           |     |         |             |              |      |                                                                                                                                                                                                                    |                                                                                                                                                                                                                                                                                                                                             |         |         |         |       |     |                                                                                                                                                                                                                                                                                                                                                                                            |         |         |         |                 |     |     |                |   |   |         |   |   |          |   |   |
|                 | ST (mm)                         | RI (mm)                                                                                                                                                                                                                                                                                                                              |                    |                      |          |                                 |             |             |                                                                                                                                                                                                                                           |     |         |             |              |      |                                                                                                                                                                                                                    |                                                                                                                                                                                                                                                                                                                                             |         |         |         |       |     |                                                                                                                                                                                                                                                                                                                                                                                            |         |         |         |                 |     |     |                |   |   |         |   |   |          |   |   |
| Axial           | 5                               | 3                                                                                                                                                                                                                                                                                                                                    |                    |                      |          |                                 |             |             |                                                                                                                                                                                                                                           |     |         |             |              |      |                                                                                                                                                                                                                    |                                                                                                                                                                                                                                                                                                                                             |         |         |         |       |     |                                                                                                                                                                                                                                                                                                                                                                                            |         |         |         |                 |     |     |                |   |   |         |   |   |          |   |   |
| Coronal         | 5                               | 3                                                                                                                                                                                                                                                                                                                                    |                    |                      |          |                                 |             |             |                                                                                                                                                                                                                                           |     |         |             |              |      |                                                                                                                                                                                                                    |                                                                                                                                                                                                                                                                                                                                             |         |         |         |       |     |                                                                                                                                                                                                                                                                                                                                                                                            |         |         |         |                 |     |     |                |   |   |         |   |   |          |   |   |
| Sagittal        | 5                               | 3                                                                                                                                                                                                                                                                                                                                    |                    |                      |          |                                 |             |             |                                                                                                                                                                                                                                           |     |         |             |              |      |                                                                                                                                                                                                                    |                                                                                                                                                                                                                                                                                                                                             |         |         |         |       |     |                                                                                                                                                                                                                                                                                                                                                                                            |         |         |         |                 |     |     |                |   |   |         |   |   |          |   |   |
